# Supplementary material for: Do celebrity endorsements matter? Observational study of BRCA gene testing and mastectomy rates after Angelina Jolie’s New York Times editorial
Source: PubMed Central journal article supplement — BMJ. 2016 Dec 14;355:i6357. doi: 10.1136/bmj.i6357 (PMC5156611; doi:10.1136/bmj.i6357), 2016-12-14
Supplement: dess034760.ww1_default.pdf [file dess034760.ww1_default.pdf]

**Online appendix to:**

**Do celebrity endorsements matter? Observational study of BRCA gene testing and mastectomy rates after Angelina Jolie's New York Times editorial**

Sunita Desai, Ph.D.

Anupam B. Jena, M.D., Ph.D.

**Appendix 1. Characteristics of women who had BRCA test before and after May 14, 2013**

|                                 | Women who received BRCA testing before the editorial<br>(n=17,827) |            | Women who received BRCA testing after the editorial<br>(n=15,233) |            |
|---------------------------------|--------------------------------------------------------------------|------------|-------------------------------------------------------------------|------------|
|                                 | No.                                                                | % of total | No.                                                               | % of total |
| <i>Age Categories, years</i>    |                                                                    |            |                                                                   |            |
| 18-25                           | 429                                                                | 2%         | 422                                                               | 3%         |
| 26-35                           | 1884                                                               | 11%        | 1803                                                              | 12%        |
| 36-45                           | 5129                                                               | 29%        | 4415                                                              | 29%        |
| 46-55                           | 6492                                                               | 36%        | 5302                                                              | 35%        |
| 56-64                           | 3893                                                               | 22%        | 3291                                                              | 22%        |
| <i>U.S. Census Region</i>       |                                                                    |            |                                                                   |            |
| Northeast                       | 4309                                                               | 24%        | 3291                                                              | 22%        |
| North Central                   | 3464                                                               | 19%        | 3206                                                              | 21%        |
| South                           | 5401                                                               | 30%        | 5089                                                              | 33%        |
| West                            | 4194                                                               | 24%        | 3640                                                              | 24%        |
| Unknown                         | 459                                                                | 3%         | 7                                                                 | 0%         |
| <i>Insurance Plan Type</i>      |                                                                    |            |                                                                   |            |
| Preferred Provider Organization | 11457                                                              | 64%        | 10673                                                             | 70%        |
| Health Maintenance Organization | 2303                                                               | 13%        | 1868                                                              | 12%        |
| Consumer Directed Health Plan   | 886                                                                | 5%         | 986                                                               | 6%         |
| Other                           | 2478                                                               | 14%        | 1021                                                              | 7%         |

## **Appendix 2.**

As a sensitivity test, we re-estimated the difference-in-differences analysis using a 30-day before-after window. Rates rose from 0.73 tests per 100,000 women in the 30 business days before May 14 to 1.10 tests in the 30 business days after in 2013. In comparison, daily BRCA test rates were relatively similar in the same period in 2012 (0.58 per 100,000 women in the 30 business days before May 14 versus 0.57 tests per 100,000 in the 30 business days after). This corresponds to an adjusted difference-in-difference absolute *daily* increase of 0.38 tests per 100,000 women, or a 52% relative increase ( $p < 0.001$ ). **eFigure1** illustrates daily BRCA rates during this time period.

**eFigure1. Daily BRCA Test Rates in 30 Days Before and After May 14, 2013 Jolie Editorial versus control period in 2012**

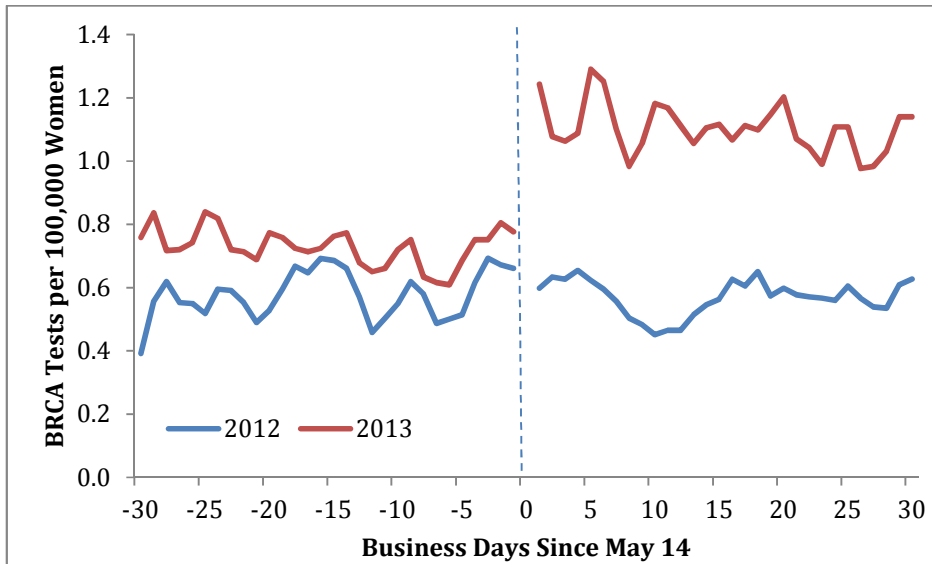

Notes: BRCA tests were identified with CPT codes 81211-81217. In Panel A, a three-day moving average of the testing rate is shown. Daily rates are for the 30 *business* days before and after May 14. Year 2012 rates are shown to serve as a control to account for seasonal trends.

### **Appendix 3.**

We computed national estimates of incremental BRCA tests and expenditures associated with the editorial in the 15 business days following publication by multiplying the difference-in-difference change in BRCA testing by the average dollar reimbursed amount for the test in 2013 (calculated from reimbursements paid by the commercial insurer in our data) and then multiplying these expenditures by the number of commercially-insured women aged 18-64 in the country, as reported in 2013 U.S. Census estimates.<sup>15</sup>

The average cost (the sum of insurer payment and patient out-of-pocket copayments, coinsurance, and deductible amounts paid to the provider) for a BRCA gene test was \$3,027 USD in 2013 (approximately £1,952 in 2013). Multiplying this amount by the incremental difference-in-difference increase in the probability of BRCA testing in the 15 business days after Jolie's editorial and a 2013 Census estimate of 67,493,000 commercially-insured women aged 18-64 years suggests that the editorial was associated with approximately 4,500 additional tests nationally and over \$13.5 million in incremental expenditures on BRCA tests in the 15 business days following the editorial.
